# Supplementary material for: IMproving the practice of intrapartum electronic fetal heart rate MOnitoring with cardiotocography for safer childbirth (the IMMO programme): protocol for a qualitative study
Source: PubMed Central journal article supplement (PMC6609047; doi:10.1136/bmjopen-2019-030271), 2019-06-28
Supplement: bmjopen-2019-030271.draft_revisions.pdf [file bmjopen-2019-030271.draft_revisions.pdf]

# BMJ Open

BMJ Open is committed to open peer review. As part of this commitment we make the peer review history of every article we publish publicly available.

When an article is published we post the peer reviewers' comments and the authors' responses online. We also post the versions of the paper that were used during peer review. These are the versions that the peer review comments apply to.

The versions of the paper that follow are the versions that were submitted during the peer review process. They are not the versions of record or the final published versions. They should not be cited or distributed as the published version of this manuscript.

BMJ Open is an open access journal and the full, final, typeset and author-corrected version of record of the manuscript is available on our site with no access controls, subscription charges or pay-per-view fees (<http://bmjopen.bmj.com>).

If you have any questions on BMJ Open's open peer review process please email [info.bmjopen@bmj.com](mailto:info.bmjopen@bmj.com)

# BMJ Open

## IMproving the practice of intrapartum electronic fetal heart rate MOnitoring with cardiotocography for safer childbirth (the IMMO programme): Protocol for a qualitative study

|                               |                                                                                                                                                                                                                                                                                                                                                                                                                                                                                                                                                                                                                                                                                                                                                                                          |
|-------------------------------|------------------------------------------------------------------------------------------------------------------------------------------------------------------------------------------------------------------------------------------------------------------------------------------------------------------------------------------------------------------------------------------------------------------------------------------------------------------------------------------------------------------------------------------------------------------------------------------------------------------------------------------------------------------------------------------------------------------------------------------------------------------------------------------|
| Journal:                      | <i>BMJ Open</i>                                                                                                                                                                                                                                                                                                                                                                                                                                                                                                                                                                                                                                                                                                                                                                          |
| Manuscript ID                 | bmjopen-2019-030271                                                                                                                                                                                                                                                                                                                                                                                                                                                                                                                                                                                                                                                                                                                                                                      |
| Article Type:                 | Protocol                                                                                                                                                                                                                                                                                                                                                                                                                                                                                                                                                                                                                                                                                                                                                                                 |
| Date Submitted by the Author: | 06-Mar-2019                                                                                                                                                                                                                                                                                                                                                                                                                                                                                                                                                                                                                                                                                                                                                                              |
| Complete List of Authors:     | Lamé, Guillaume; University of Cambridge, The Healthcare Improvement Studies Institute (THIS Institute)<br>Liberati, Elisa ; University of Cambridge, The Healthcare Improvement Studies Institute (THIS Institute)<br>Burt, Jenni; University of Cambridge, The Healthcare Improvement Studies Institute (THIS Institute)<br>Draycott, Tim; University of Bristol, School of Social and Community Medicine; North Bristol NHS Trust, Women and Children's Health<br>Winter, Cathy; University of Bristol School of Social and Community Medicine; North Bristol NHS Trust, Women and Children's Health<br>Ward, James; University of Cambridge, Engineering Design Centre<br>Dixon-Woods, Mary ; University of Cambridge, The Healthcare Improvement Studies Institute (THIS Institute) |
| Keywords:                     | Quality in health care < HEALTH SERVICES ADMINISTRATION & MANAGEMENT, Risk management < HEALTH SERVICES ADMINISTRATION & MANAGEMENT, Fetal medicine < OBSTETRICS, QUALITATIVE RESEARCH, Cardiotocography, electronic fetal heartrate monitoring                                                                                                                                                                                                                                                                                                                                                                                                                                                                                                                                          |
|                               |                                                                                                                                                                                                                                                                                                                                                                                                                                                                                                                                                                                                                                                                                                                                                                                          |

SCHOLARONE™  
Manuscripts

# Improving the practice of intrapartum electronic fetal heart rate Monitoring with cardiotocography for safer childbirth (the IMMO programme): Protocol for a qualitative study

**Target journal:** BMJ Open

**Paper type:** Protocol

**Word count (excl. abstract, acknowledgements and references):** 3855 (max 4000)

**Authors:** Guillaume Lame<sup>1\*</sup>, Elisa Liberati<sup>1</sup>, Jenni Burt<sup>1</sup>, Tim Draycott<sup>2,3</sup>, Cathy Winter<sup>2,3</sup>, James Ward<sup>4</sup>, Mary Dixon-Woods<sup>1</sup>.

<sup>1</sup>The Healthcare Improvement Studies Institute (THIS Institute), University of Cambridge, Cambridge, UK.

<sup>2</sup>School of Social and Community Medicine, University of Bristol, Bristol, UK

<sup>3</sup>Women and Children's Health, North Bristol NHS Trust, Bristol, UK

<sup>4</sup>Engineering Design Centre, University of Cambridge, Cambridge, UK.

\* corresponding author: [guillaume.lame@thisinstitute.cam.ac.uk](mailto:guillaume.lame@thisinstitute.cam.ac.uk) – 01223 761598 – The Healthcare Improvement Studies Institute, University of Cambridge, Cambridge Biomedical campus, Clifford Allbutt building, Cambridge CB2 0AH, United Kingdom.

## Abstract:

**Introduction:** Sub-optimal electronic fetal heart rate monitoring (EFM) in labour using CardioTocoGraphy (CTG) has been identified as one of the most common causes of avoidable harm in maternity care. Training staff is a frequently proposed solution to reduce harm. However, current approaches to training are heterogeneous in content and format, making it difficult to assess effectiveness. Technological solutions, such as digital decision support, have not yet demonstrated improved outcomes. Effective improvement strategies require in-depth understanding of the technical and social mechanisms underpinning the EFM process. The aim of this study is to advance current knowledge of the types of errors, hazards and failure modes in the process of classifying, interpreting, and responding to, CTG traces. This study is part of a broader research programme aimed at developing and testing an intervention to improve intrapartum EFM.

1  
2  
3 **Methods and analysis:** The study is organised into two workstreams. First, we will conduct  
4 observations and interviews in three UK maternity units to gain an in-depth understanding of how  
5 intrapartum EFM is performed in routine clinical practice. Data analysis will combine the insights of  
6 an ethnographic approach (focused on the social norms and interactions, values and meanings that  
7 appear to be linked with the process of EFM) with a systems thinking approach (focused on  
8 modelling processes, actors and their interactions). Second, we will use risk analysis techniques to  
9 develop a framework of the errors, hazards and failure modes that affect intrapartum EFM.  
10  
11

12 **Ethics and dissemination:** This study has been approved by the West Midlands - South Birmingham  
13 Research Ethics Committee, reference number: 18/WM/0292. Dissemination will take the form of  
14 academic articles in peer-reviewed journals and conferences, along with tailored communication  
15 with various stakeholders in maternity care.  
16  
17

18  
19 **Strengths and limitations of this study:**  
20

- 21 • A multidisciplinary team of obstetricians, social scientists, midwives and engineers will  
22 collaborate to characterise the technical and social mechanisms that may affect the safety of  
23 EFM in labour.  
24
- 25 • The study combines the strengths of ethnographic research and engineering approaches to  
26 systems analysis and risk assessment.  
27
- 28 • This project will generate a detailed characterisation of the errors, hazards and failure modes  
29 in intrapartum EFM and will help to inform the development of an intervention that will  
30 directly target the reasons for problems in interpretation and response to CTG traces.  
31  
32
- 33 • Three maternity units across the UK will be selected; the generalisability of the findings will  
34 require careful assessment.  
35  
36  
37  
38  
39  
40  
41  
42  
43  
44  
45  
46  
47  
48  
49  
50  
51  
52  
53  
54  
55  
56  
57  
58  
59  
60

# Improving the practice of intrapartum electronic fetal heart rate Monitoring with cardiotocography for safer childbirth (the IMMO programme): Protocol for a qualitative study

## INTRODUCTION

Preventable harm related to childbirth can be catastrophic for women, children and families,<sup>1</sup> as well as causing high costs for health systems.<sup>2</sup> One important source of preventable harm in maternity care arises from sub-optimal fetal heart rate monitoring, particularly electronic fetal heart rate monitoring (EFM) using Cardiotocography (CTG) in labour.<sup>3</sup> Effective interventions to improve the practice of EFM have remained elusive, perhaps in part because of a lack of sound understanding of its range of influences on safety. We aim to generate a comprehensive characterisation of the technical and social mechanisms that may affect the safety of EFM in labour with the goal of informing the development of a targeted intervention for improvement.

### Fetal monitoring in labour

Two principal methods can be used to monitor the fetal heart rate in labour: intermittent auscultation and Electronic Fetal heart rate Monitoring (EFM) with cardiotocography (CTG). Our study focuses on the use of CTG, where the baby's heart rate is monitored through a Doppler ultrasound transducer and the woman's contractions are monitored through a uterine pressure transducer. Both signals are monitored continuously and recorded and/or printed as a CTG trace.<sup>4</sup> These traces are then used to detect fetal heart rate abnormalities and trigger appropriate action.

Interpretation and response to intrapartum CTG traces involves a series of complex socio-technical processes with many potential points of failure. **Interpretation** of CTG traces requires healthcare professionals to consider the classification of the trace in the context of the clinical circumstances of the mother, the fetus and the status of labour, in order to formulate a response and take action. The initial classification involves review of four features on the CTG trace: the baseline heart rate, baseline variability, the presence of accelerations, and the presence or absence of decelerations, as

1  
2  
3 well as characteristics of variable decelerations if present. NICE guidelines provide criteria to classify  
4 each feature as “reassuring”, “non-reassuring” or “abnormal”.<sup>5</sup> The trace itself is then classified in  
5 one of four ways: 1) “normal” (all features are reassuring), 2) “suspicious” (one non-reassuring  
6 feature and all other features are reassuring), 3) “pathological” (one abnormal feature or two or  
7 more non-reassuring features) or 4) “need for urgent intervention” (acute bradycardia, or a single  
8 prolonged deceleration for 3 minutes or more).  
9

10  
11 In determining **responses** to non-normal traces, NICE guidelines provide management indications to  
12 be considered in context with the clinical circumstances. The guidelines also recommend  
13 documenting any maternal or fetal risk factors, the woman’s and the unborn baby’s condition, CTG  
14 review every hour using a structured document, a ‘fresh eyes review of the CTG’, and seeking senior  
15 advice (from a senior midwife or an obstetrician) when the CTG is difficult to interpret or is not  
16 categorised as normal.  
17

18  
19 Despite the guidance, studies consistently show high levels of inter- and intra-observer variability in  
20 the interpretation of CTGs.<sup>6-9</sup> Some technological solutions have been proposed, including the  
21 introduction of computerised decision support systems for CTG interpretation in labour. However,  
22 their effectiveness remains unclear: a large randomised controlled trial did not indicate a benefit of  
23 computerised decision support.<sup>10</sup> Research on response to non-normal CTG traces has remained  
24 under-developed.  
25

26  
27 Overall, training for healthcare staff is currently the most frequently proposed solution to sub-  
28 optimal CTG practice.<sup>3 11 12</sup> The NHS England *Saving Babies’ Lives* “care bundle” states that all staff  
29 undertaking fetal monitoring should be trained in both the review system and the escalation  
30 protocol,<sup>12</sup> with mandatory yearly training and competency assessment. Implementation of this  
31 bundle is measured as the percentage of staff who have received training in fetal monitoring; the  
32 percentage deemed competent in fetal monitoring; and the percentage whom have successfully  
33 completed mandatory annual updates.  
34

35  
36 It is clearly important that such training be supported by high quality evidence. A 2011 systematic  
37 review concluded that training for CTG interpretation in labour can lead to improvements in  
38 individuals’ interpretation skills, inter-observer agreement, and management of intrapartum CTGs.<sup>13</sup>  
39 However, the training interventions included in the systematic review were highly heterogeneous in  
40 format and content (including e-learning, case reviews, monthly audit with feedback, voluntary  
41 review sessions, and clinical supervision through tele-didactics), making it difficult to draw definitive  
42 conclusions on what features and mechanisms of the training were linked with practice  
43 improvement. The authors of the systematic review also noted that the generally poor quality of the  
44 reviewed studies warrants caution with the findings.<sup>13</sup>  
45

46  
47 Perhaps because so little evidence exists, training programmes are not standardised,<sup>14</sup> and where  
48 programmes are implemented there are difficulties in demonstrating positive impacts. For example,  
49 in Denmark all midwives and physicians in maternity units were required to take part in a CTG  
50 education program consisting of e-learning, a one-day course, and a final written assessment.<sup>15</sup> The  
51 evaluation of this program suggested that it did not decrease the risk of birth hypoxia.<sup>16</sup> A national  
52 intervention in Sweden yielded similar results.<sup>17 18</sup>  
53

54  
55 One challenge in moving the field forward is that most of the effort so far is based on the  
56 assumption that improvement requires targeting deficits in individuals’ knowledge.<sup>19 20</sup> Improving  
57 each staff member’s knowledge and skill is clearly important, but insufficient attention has been  
58 granted to the other dimensions of why it may be difficult to improve interpretation and response to  
59 electronic fetal monitoring. CTG interpretation can, for example, be hindered by cognitive biases:  
60

1  
2  
3 individuals sometimes rely on intuition rather than objective guidelines to interpret and document  
4 intrapartum CTGs.<sup>21</sup>  
5

6 Even when intrapartum CTGs are interpreted correctly, the response may be sub-optimal. Social,  
7 organisational, and cultural features of maternity units and the wider institutions in which they sit  
8 may inhibit staff from taking the appropriate action, communicating their concerns, or reacting  
9 appropriately to a request for intervention.<sup>22 23</sup> Disagreements and divergences between midwives  
10 and obstetricians and conflicts over professional boundaries are an unfortunate characteristic of  
11 some maternity units.<sup>21 24 25</sup> Multiple other features of the labour process, including pressures on  
12 facilities, and aspirations of parents for their birth experience make the circumstances of decision-  
13 making and mobilisation of response particularly challenging.  
14  
15

16 Interpreting and reacting to a CTG trace is therefore best understood as a complex socio-technical  
17 process involving individuals from multiple professions and disciplines, taking place over a number of  
18 stages and in highly pressurised contexts. Given this, purely technical interventions (e.g. computer-  
19 assisted CTG analysis) and individual-based training are unlikely to fully address these challenges.  
20 We propose that understanding what can go wrong when electronic fetal monitoring is used  
21 requires full characterisation of the work and social practices involved, the multiple professions who  
22 conduct such practices, and the context where the process takes place.<sup>26</sup>  
23  
24  
25  
26  
27

## 28 METHODS

29  
30  
31

### 32 Aims

33  
34  
35

36 The overarching aim of this study is to advance understanding of how intrapartum electronic fetal  
37 monitoring (EFM) is currently performed in UK maternity units, and where risks may occur, in order  
38 to inform the development of an intervention to improve practice. The study comprises two  
39 workstreams (Figure 1):  
40

- 41 1. An ethnographic study informed by systems engineering to characterise how intrapartum  
42 EFM is currently undertaken in UK maternity units
- 43 2. Production of a framework of the types of errors, hazards and failure modes in intrapartum  
44 EFM in UK maternity units  
45  
46  
47  
48  
49

### 50 Workstream 1: an ethnographic study of intrapartum electronic fetal 51 monitoring 52 53 54

55 This workstream adopts an ethnographic approach combined with systems engineering analytical  
56 techniques to characterise how intrapartum electronic fetal monitoring (EFM) is currently  
57 undertaken in UK maternity units. We will conduct **observations** and **semi-structured interviews**  
58 with healthcare professionals in three representative maternity units in the UK, in order to:  
59  
60

- Map the activities (and relevant risk and hazards) involved in electronic fetal monitoring
- Identify and describe the contextual, cultural and socio-technical factors that influence practices of EFM with CTG.

*Ethnography* is an approach to social and organizational research that draws on researchers' close observation of and involvement with people in a particular setting, with the aim of accessing their *point of view* – namely, their perspectives in and on the world they inhabit.<sup>27</sup> This approach allows the examination of important aspects of clinical work that may be invisible or difficult to articulate by professionals themselves and that may not be amenable to measurement in the traditional sense.<sup>28</sup> It is especially well-suited to identifying the informal interactions that may create or prevent risk, and to shedding light on the multiple influencing factors that shape clinical practice.

Ethnography may also offer insights on the wider organizational and cultural dynamics that may explain why accidents or 'close calls' are welcomed as a learning opportunity in some contexts, and ignored or normalized in others.<sup>29</sup>

*Systems engineering* focuses on how to design and manage complex systems over their lifecycles. Adopting 'systems thinking' principles<sup>30</sup> and approaches from human factors analysis,<sup>31</sup> it seeks to ensure that all relevant aspects (social and technical) of a complex process or system are considered and integrated into a whole. The approach is particularly useful in gaining a comprehensive and thorough understanding of the risk and hazards that may affect complex healthcare processes.

## Eligibility criteria

The research participants in this study will be staff in the maternity units who are directly or indirectly involved in the process of EFM with CTG. We will observe staff in the participating maternity units who are directly or indirectly involved in the process of EFM with CTG, including, for example, obstetricians, midwives, nurses, anaesthetists, maternity care assistants, maternity theatre staff, auxiliary/administrative staff, and management staff. Women and birth partners/relatives will not be the main participants of the study, but are likely to be included in the observations.

For the interviews, we will include doctors and midwives in the participating maternity units who have been directly involved in using EFM with CTG for at least one year (either in their current site or elsewhere). We will not include doctors or midwives with less than one year of experience of EFM with CTG (either in their current site or elsewhere) in interviews. We do not plan to interview women and birth partners/relatives.

## Sampling

Three maternity units will be included in the study. They will be selected purposively based on their size, calculated though annual number of births. Units' size and geographic situation have also been shown to be correlated with CTG interpretation skills.<sup>32</sup> We will recruit one small unit (fewer than 2,000 births/year), one medium unit (2,000 to 5,000 births/year), and one large unit (more than 5,000 births/year). We will also take into account the geographic situation of the hospital. The objective of this sampling strategy is to understand CTG processes and how they vary between units and regions.



1  
2  
3 In each maternity unit, we will recruit up to 12 individual members of staff for interviews. Interview  
4 participants will be selected purposively: we will seek to interview participants with different  
5 professional backgrounds (midwives and obstetricians), seniority and professional experiences in  
6 maternity care.  
7  
8  
9

## 10 Observations

11  
12  
13  
14 We expect to have both a social scientist and a systems engineer spend up to seven days in each  
15 maternity unit (together or at different times), combining day and night observations, and  
16 conducting observation blocks of around 8 hours per day/night. The focus of the observations will be  
17 the process through which CTG traces are classified and actions are documented; observers may also  
18 'shadow' <sup>33</sup> midwives and obstetricians in order to understand the interactions between  
19 professionals, and between professionals and parents, and the escalation mechanisms used in  
20 response to CTG traces. The ethnographer's observations will focus mainly on the social and  
21 contextual factors that influence fetal monitoring practice and outcomes. The systems engineer will  
22 capture and map the constituting activities, and the hazards and risks that characterize the process  
23 using human factors concepts drawn from existing risk assessment models to guide observations.  
24  
25

26 The data collected will consist of anonymised field notes taken during the observations. At the end  
27 of each day, these notes will be dictated and recorded using an encrypted voice recorder for later  
28 transcription, or written up manually.  
29

30 No photos or videos will be taken of human subjects, but we may take pictures of equipment.  
31 Researchers will additionally request relevant documents (e.g. local guidelines, training materials,  
32 posters etc.) from sites. If these documents contain identifying information about any individuals,  
33 they will be anonymized prior to storage and analysis.  
34  
35  
36  
37

### 38 *Consent for observations*

39 As we have found in previous studies, it will not be practical nor appropriate to obtain written  
40 consent in all situations where we will be conducting observations. We are conscious that in some  
41 circumstances asking people for written consent for observations can make them uncomfortable,  
42 disrupt clinical work, or alter people's behaviour. In such situations, obtaining written consent is  
43 more likely to be for the researchers' benefit than those being studied. Therefore, we plan to use an  
44 approach we have used successfully in previous studies, which relies on obtaining permission from  
45 those being observed, ensuring that those who wish to opt out can easily make this known, and  
46 recording only completely anonymised data.  
47  
48

49 We will ensure that staff being observed are informed of the project and are given written  
50 information to explain it. Researchers will always explain who they are and will wear an appropriate  
51 identifying badge. They will obtain verbal permission from staff where possible (sometimes this may  
52 be from a senior person on behalf of a group) to conduct observations. They will only enter the bed  
53 space of pregnant and postpartum women with the permission and agreement of clinical staff and  
54 women, and will leave immediately if requested to do so, or if there is any indication (even  
55 unvoiced) that women or birth partners/relatives would prefer them not to be there.  
56  
57

58 Women and their birth partners/relatives are not the focus of the study, and we will not seek their  
59 written consent. However, the nature of the ethnography means that we may carry out observations  
60

1  
2  
3 of staff as they come into contact with women whilst carrying out their routine clinical duties.  
4 Pregnant and postpartum women will only be observed with their permission and agreement and  
5 the permission of clinical staff. Women and birth partners will be advised verbally and in writing  
6 (using posters and leaflets) that they can decline observations. The researchers will be sensitive to  
7 explaining the aims of the study in a way that will not raise undue concerns in women and birth  
8 partners.  
9

## 10 11 12 13 Interviews

14  
15  
16 The interview schedule will cover participants' experience of electronic fetal monitoring, their views  
17 on EFM, the training they have received, and their understanding of the factors that may influence  
18 EFM processes and outcomes. Staff will be offered the choice of being interviewed individually or in  
19 a small group of two or three participants. Interviews may also be arranged by telephone if  
20 participants are not available on the days of the visits. All interviews will be audio-recorded on an  
21 encrypted voice recorder (with participants' consent) and transcribed verbatim for analysis.  
22  
23

### 24 *Consent for interviews*

25 We will obtain written informed consent for all recorded interviews.  
26  
27  
28  
29

## 30 Data analysis

31  
32  
33 Data analysis will run alongside ongoing fieldwork and will be conducted in two stages. In the first  
34 stage, the ethnographers and the systems engineers will analyse the whole dataset separately,  
35 adopting different but complementary approaches. The ethnographers' analysis will be based on the  
36 constant comparative method.<sup>34</sup> It will be informed by sensitizing concepts identified through an  
37 earlier literature review, including the role of power and psychological safety. These concepts may  
38 be revised, modified or made redundant as analysis proceeds.  
39  
40

41 The engineer's analysis will be based on systems thinking principles and risk analysis approaches.  
42 The main aim of the analysis will be to produce a comprehensive description of the process of EFM  
43 with CTG, using systems modelling techniques to describe the processes, actors and their  
44 interactions.<sup>35</sup> Depending on the nature of the findings, frameworks such as the Yorkshire and  
45 Systems Engineering Initiative for Patient Safety (SEIPS) frameworks may be used to support the  
46 analysis.<sup>31 36</sup>  
47  
48

49 In the second phase of analysis, the researchers will integrate their analyses. This combination of  
50 different disciplines and bodies of knowledge, will facilitate a synthesis between a rich  
51 understanding of individual sites and the ability to generalize from the specifics of these cases, to  
52 enable the development of new knowledge and inform action in this area.  
53

54 Debriefing sessions of the research team will be recorded, transcribed and treated as data alongside  
55 the field notes. QSR NVivo software will be used to aid the coding, management and retrieval of  
56 data.  
57  
58  
59  
60

## Workstream 2: building a framework of errors, risks and failure modes in intrapartum EFM

In Workstream 2, we aim to build a framework of errors, hazards and failure modes in electronic fetal monitoring with CTG, and identify the underlying mechanisms that can explain these. In doing this, we will draw on the findings from Workstream 1 as well as concepts from the sociology of risk (e.g. normalisation of deviance<sup>37</sup>), psychology (e.g. cognitive biases,<sup>38</sup> automaticity,<sup>39</sup> groupthink<sup>40</sup>) and human factors (e.g. socio-technical systems<sup>41</sup>).

### Design, data collection and data analysis

Our approach is informed by recent attempts to integrate different sources of knowledge into risk assessment efforts.<sup>42</sup> In our case, the choice of modelling approaches (e.g. process maps, stakeholders maps, risk analysis methods<sup>35 42</sup>) will to some extent depend on the information collected, and cannot yet be determined. We plan to combine different approaches, as previous research has shown the benefit of combining complementary risk management methods in health services.<sup>43</sup> First, we will create a representation of the intrapartum CTG interpretation and management process, drawing on observations from the ethnographic study (Workstream 1) and the extant literature. Second, using prospective risk analysis approaches (such as Failure Modes and Effects Analysis<sup>44</sup> or Hierarchical Task Analysis<sup>45</sup>) we will analyse this process to identify where problems may occur. Finally, where relevant, we will link these issues to documented patterns (e.g. cognitive biases or normalisation of deviance) in order to build on the existing knowledge of these phenomena and how to tackle them.

As part of our strategy for ensuring multidisciplinary synthesis, we will conduct a two-day workshop with the research team and relevant experts, as well as other stakeholders in healthcare risk management, obstetrics and midwifery. At this workshop, participants will reflect on, adapt and develop the representation and analysis of the intrapartum CTG interpretation and management process, to inform framework development.

The output of this phase of work will be a theoretically and empirically grounded framework of the errors, hazards and failure modes in the interpretation of, and reaction to, intrapartum CTG traces.

### *Consent for workshop participants*

Prior to the workshop, participants will be asked to give consent to the recording of the workshop and the use of data produced during the workshop (including anonymised quotes) for research purposes. This is so that we can report on the process of building the framework in publications. To this end, the workshop will be audio-recorded, and the recording will be transcribed.

## Assessing the framework's comprehensiveness through a stakeholder consultation

To ensure that the framework is comprehensive in its description of errors, hazards and failure modes in the process of EFM, we will submit the final product developed from the workshops to the assessment of a broad range of stakeholders, using an online consultation. Participants will be separate from those who participated in the workshop, and will represent obstetrics, midwifery, risk management, third sector organisations and other relevant groups.

It is too early at this stage to decide on the exact form of this consultation, which will be designed to complement the content and nature of the framework. However, it is likely to comprise a questionnaire on the comprehensiveness of the framework, asking participants to suggest additional items or remove existing ones, and asking them to rate the clarity of each item. It is possible that this may be done using a citizen science approach using THIS Institute's platform.

The product of this consultation will be a revised framework, ready for use in the next phases of this research programme, which ultimately aims to develop and evaluate an intervention to improve the use of intrapartum EFM.

## Patient & Public Involvement (PPI)

Issues with maternity safety in general, and EFM in particular, have received wide attention in recent years. Our exchanges with PPI groups have shown that the issue is of critical importance to pregnant women. Whilst pregnant women are not the primary focus of this study, we are keen to engage and involve this group along with other stakeholders in the design, conduct and dissemination of the research.

We have engaged with a network of women (maternity users) to advise us on how best to introduce the study to women in labour during our ethnographic study. These individuals reviewed our participant material (participant information leaflet, consent form, and poster) and modifications were made to the material, and to guidance on how and when to approach women in labour.

Our objective at this stage is to understand how professionals make decisions to act on a certain type of clinical information (CTG traces). The opportunities to involve pregnant and postpartum women in the research itself are limited. We plan to engage deeply with women (maternity users) in later stages of this work programme, when we will consider potential interventions to improve the practice of electronic fetal heart rate monitoring.

## ETHICS AND DISSEMINATION

This study has received ethical approval from the West Midlands - South Birmingham Research Ethics Committee, reference number: 18/WM/0292.

1  
2  
3 The main risks in this project are likely to arise when researchers are in direct contact with  
4 women/relatives in the clinical setting, during the ethnographic study (Workstream 1). We are  
5 aware of the sensitive nature of conducting observational research in a maternity care setting and  
6 are experienced in the conduct of such work. We will seek to reduce risks in the following ways:  
7

- 8 • Making sure that staff, women, and partners/relatives are informed about the project, using  
9 information sheets and posters.
- 10 • The ethnographic field researchers are highly experienced researchers with extensive  
11 expertise in sensitive research. They will provide ongoing support and supervision for the  
12 systems engineer whilst on-site. The researchers will always explain who they are and will  
13 wear an appropriate identifying badge. They will obtain verbal permission where possible  
14 (sometimes this may be from a senior person on behalf of a group) to conduct observations,  
15 and staff and women will have the right to refuse to be observed if they wish.
- 16 • The researchers will shadow members of staff and will only enter clinical areas such as  
17 labour rooms or theatres if this is essential. They will only enter the environment of women  
18 and partners/relatives with the permission and agreement of clinical staff and women.
- 19 • It is acknowledged that labour can be distressing for women/relatives, particularly if  
20 problems arise. The ethnographic field researchers will check with staff and  
21 women/relatives if they are happy for them to be present, and will leave immediately if  
22 there is any indication (even unvoiced) that staff, women or their families would prefer them  
23 not to be there.
- 24 • The researchers will take full hygiene precautions.

25  
26  
27  
28  
29  
30 The findings of this study will be communicated in peer-reviewed journal articles and conferences.  
31 We will also consider additional communication channels to convey the results to professionals, e.g.  
32 blog posts and communication on social media.  
33  
34  
35  
36

## 37 **AUTHORS' CONTRIBUTION**

38  
39 MDW, JB, EGL, TD, CW and GL conceived the initial idea for the study. GL coordinated the writing of  
40 the protocol with input from all co-authors. All authors commented on the protocol and provided  
41 substantial ideas in their respective areas of expertise. GL drafted the paper and all authors revised  
42 it. All authors approved the submitted version of the paper.  
43  
44  
45  
46  
47

## 48 **FUNDING STATEMENT**

49 This research project is carried out by The Healthcare Improvement Studies Institute at the  
50 University of Cambridge. The Institute is supported by the Health Foundation - an independent  
51 charity committed to bringing about better health and health care for people in the UK. This work  
52 was also supported by MDW's Wellcome Trust Investigator award WT09789. MDW is a National  
53 Institute for Health Research (NIHR) Senior Investigator.  
54  
55  
56  
57  
58  
59  
60

## COMPETING INTERESTS

TD is a trustee of the PRactical Obstetric Multi-Professional Training (PROMPT) Maternity Foundation. The PROMPT Maternity Foundation (PMF) is an independent charity (registered charity number 1140557) set up to save the lives of mothers and babies through evidence-based, multi-professional training and research. This includes training on fetal heart rate monitoring. TD and CW are members of the steering group of PMF. CW is seconded from North Bristol Trust as the lead research midwife for PMF. TD does not receive any financial reward from his association with PMF.

## REFERENCES

1. Kirkup B. The Report of the Morecambe Bay Investigation. London, UK: Morecambe Bay Investigation, 2015:221.
2. NHS Resolution. Annual report and accounts 2016/17. London: NHS Resolution, 2017:168.
3. NHS Litigation Authority. Ten Years of Maternity Claims - An Analysis of NHS Litigation Authority Data. London: NHS Litigation Authority, 2012.
4. Alfirevic Z, Devane D, Gyte GML, et al. Continuous cardiotocography (CTG) as a form of electronic fetal monitoring (EFM) for fetal assessment during labour. In: The Cochrane C, ed. Cochrane Database of Systematic Reviews. Chichester, UK: John Wiley & Sons, Ltd 2017.
5. NICE. Intrapartum care for healthy women and babies. London: National Institute for Health and Care Excellence, 2014:89.
6. Sabiani L, Le Dû R, Loundou A, et al. Intra- and interobserver agreement among obstetric experts in court regarding the review of abnormal fetal heart rate tracings and obstetrical management. *American Journal of Obstetrics and Gynecology* 2015;213(6):856.e1-56.e8. doi: 10.1016/j.ajog.2015.08.066
7. Chauhan SP, Klauser CK, Woodring TC, et al. Intrapartum nonreassuring fetal heart rate tracing and prediction of adverse outcomes: interobserver variability. *American Journal of Obstetrics and Gynecology* 2008;199(6):623.e1-23.e5. doi: 10.1016/j.ajog.2008.06.027
8. Blix E. Inter-observer variation in assessment of 845 labour admission tests: comparison between midwives and obstetricians in the clinical setting and two experts. *BJOG: An International Journal of Obstetrics and Gynaecology* 2003;110(1):1-5. doi: 10.1016/S1470-0328(02)02105-5
9. Devane D, Lalor J. Midwives' visual interpretation of intrapartum cardiotocographs: intra- and inter-observer agreement. *Journal of Advanced Nursing* 2005;52(2):133-41. doi: 10.1111/j.1365-2648.2005.03575.x
10. Brocklehurst P, Field D, Greene K, et al. Computerised interpretation of fetal heart rate during labour (INFANT): a randomised controlled trial. *The Lancet* 2017;389(10080):1719-29. doi: 10.1016/S0140-6736(17)30568-8
11. Royal College of Obstetricians and Gynaecologists. Each Baby Counts: 2015 Summary Report. London: RCOG, 2017.
12. NHS England. Saving Babies' Lives - A care bundle for reducing stillbirth. London: NHS England, 2016:30.
13. Pehrson C, Sorensen J, Amer-Wåhlin I. Evaluation and impact of cardiotocography training programmes: a systematic review: Evaluation and impact of CTG training programmes. *BJOG:*

- 1  
2  
3 *An International Journal of Obstetrics & Gynaecology* 2011;118(8):926-35. doi:  
4 10.1111/j.1471-0528.2011.03021.x
- 5  
6 14. Ugwumadu A, Steer P, Parer B, et al. Time to optimise and enforce training in interpretation of  
7 intrapartum cardiotocograph. *BJOG: An International Journal of Obstetrics & Gynaecology*  
8 2016;123(6):866-69. doi: 10.1111/1471-0528.13846
- 9  
10 15. Thellessen L, Bergholt T, Hedegaard M, et al. Development of a written assessment for a national  
11 interprofessional cardiotocography education program. *BMC Medical Education* 2017;17:88.  
12 doi: 10.1186/s12909-017-0915-2
- 13  
14 16. Thellessen L. A national cardiotocography education programme-Development, validation and  
15 impact on interpretation skills and birth hypoxia. University of Copenhagen, 2016.
- 16  
17 17. Milde-Luthander C, Källén K, Nyström ME, et al. Results from the National Perinatal Patient Safety  
18 Program in Sweden: the challenge of evaluation. *Acta Obstetrica et Gynecologica*  
19 *Scandinavica* 2016;95(5):596-603. doi: 10.1111/aogs.12873
- 20  
21 18. Milde-Luthander C, Högberg U, Nyström ME, et al. The impact of a computer assisted learning  
22 programme on the ability to interpret cardiotocography. A before and after study. *Sexual &*  
23 *Reproductive Healthcare* 2012;3(1):37-41. doi: 10.1016/j.srhc.2011.10.001
- 24  
25 19. Magro M. Five years of cerebral palsy claims - A thematic review of NHS Resolution data. London,  
26 UK: NHS Resolution, 2017:92.
- 27  
28 20. Edozien LC. Situational Awareness and Its Application in the Delivery Suite. *Obstetrics &*  
29 *Gynecology* 2015;125(1):65-69. doi: 10.1097/AOG.0000000000000597
- 30  
31 21. Simpson KR, James DC, Knox GE. Nurse-Physician Communication During Labor and Birth:  
32 Implications for Patient Safety. *Journal of Obstetric, Gynecologic & Neonatal Nursing*  
33 2006;35(4):547-56. doi: 10.1111/j.1552-6909.2006.00075.x
- 34  
35 22. McKeivitt S, Gillen P, Sinclair M. Midwives' and doctors' attitudes towards the use of the  
36 cardiotocograph machine. *Midwifery* 2011;27(6):e279-e85. doi: 10.1016/j.midw.2010.11.003
- 37  
38 23. Symon AG, McStea B, Murphy-Black T. An exploratory mixed-methods study of Scottish midwives'  
39 understandings and perceptions of clinical near misses in maternity care. *Midwifery*  
40 2006;22(2):125-36. doi: 10.1016/j.midw.2005.05.005
- 41  
42 24. Reiger K. Domination or Mutual Recognition? Professional Subjectivity in Midwifery and  
43 Obstetrics. *Social Theory & Health* 2008;6(2):132-47. doi: 10.1057/palgrave.sth.2007.12
- 44  
45 25. Pollard KC. How midwives' discursive practices contribute to the maintenance of the status quo in  
46 English maternity care. *Midwifery* 2011;27(5):612-19. doi: 10.1016/j.midw.2010.06.018
- 47  
48 26. Altaf S, Oppenheimer C, Shaw R, et al. Practices and views on fetal heart monitoring: a structured  
49 observation and interview study. *BJOG: An International Journal of Obstetrics & Gynaecology*  
50 2006;113(4):409-18. doi: 10.1111/j.1471-0528.2006.00884.x
- 51  
52 27. Hammersley M, Atkinson P. *Ethnography: principles in practice*. London: Routledge 2007.
- 53  
54 28. Dixon-Woods M. What can ethnography do for quality and safety in health care? *Quality and Safety*  
55 *in Health Care* 2003;12(5):326-27. doi: 10.1136/qhc.12.5.326
- 56  
57 29. Macrae C. *Close calls : managing risk and resilience in airline flight safety*. Basingstoke: Palgrave  
58 Macmillan 2014.
- 59  
60 30. Jackson MC. *Systems thinking: creative holism for managers*. Chichester; Hoboken, NJ: John Wiley  
& Sons 2003.
31. Carayon P, Hundt AS, Karsh BT, et al. Work system design for patient safety: the SEIPS model.  
*Quality & Safety in Health Care* 2006;15(Suppl 1):i50-i58. doi: 10.1136/qshc.2005.015842
32. Thellessen L, Sorensen JL, Hedegaard M, et al. Cardiotocography interpretation skills and the  
association with size of maternity unit, years of obstetric work experience and healthcare  
professional background: a national cross-sectional study. *Acta Obstetrica et Gynecologica*  
*Scandinavica* 2017;96(9):1075-83. doi: 10.1111/aogs.13171
33. Czarniawska-Joerges B. *Shadowing and other techniques for doing fieldwork in modern societies*:  
Copenhagen Business School Press DK 2007.

- 1  
2  
3  
4 34. Charmaz K. Constructing grounded theory: A practical guide through qualitative analysis. London: Sage 2006.
- 5  
6 35. Jun GT, Ward J, Morris Z, et al. Health care process modelling: which method when? *International Journal for Quality in Health Care* 2009;21(3):214-24. doi: 10.1093/intqhc/mzp016
- 7  
8 36. Lawton R, McEachan RRC, Giles SJ, et al. Development of an evidence-based framework of factors contributing to patient safety incidents in hospital settings: a systematic review. *BMJ Quality & Safety* 2012 doi: 10.1136/bmjqs-2011-000443
- 9  
10  
11 37. Prielipp RC, Magro M, Morell RC, et al. The Normalization of Deviance: Do We (Un)Knowingly Accept Doing the Wrong Thing? *Anesthesia & Analgesia* 2010;110(5):1499-502. doi: 10.1213/ANE.0b013e3181d5adc5
- 12  
13  
14 38. Croskerry P. From Mindless to Mindful Practice — Cognitive Bias and Clinical Decision Making. *New England Journal of Medicine* 2013;368(26):2445-48. doi: 10.1056/NEJMp1303712
- 15  
16  
17 39. Toft B, Mascie-Taylor H. Involuntary automaticity: a work-system induced risk to safe health care. *Health Services Management Research* 2005;18(4):211-16. doi: 10.1258/095148405774518615
- 18  
19  
20 40. Kaba A, Wishart I, Fraser K, et al. Are we at risk of groupthink in our approach to teamwork interventions in health care? *Medical Education* 2016;50(4):400-08. doi: 10.1111/medu.12943
- 21  
22  
23 41. Carayon P. Human factors of complex sociotechnical systems. *Applied Ergonomics* 2006;37(4):525-35. doi: 10.1016/j.apergo.2006.04.011
- 24  
25  
26 42. Simsekler MCE, Ward JR, Clarkson PJ. Design for Patient Safety: A Systems-based Risk Identification Framework. *Ergonomics* 2018;1-39. doi: 10.1080/00140139.2018.1437224
- 27  
28  
29 43. Chatzimichailidou MM, Ward J, Horberry T, et al. A Comparison of the Bow-Tie and STAMP Approaches to Reduce the Risk of Surgical Instrument Retention. *Risk Analysis*:n/a-n/a. doi: 10.1111/risa.12897
- 30  
31  
32 44. Vélez-Díaz-Pallarés M, Delgado-Silveira E, Carretero-Accame ME, et al. Using Healthcare Failure Mode and Effect Analysis to reduce medication errors in the process of drug prescription, validation and dispensing in hospitalised patients. *BMJ Quality & Safety* 2013;22(1):42-52. doi: 10.1136/bmjqs-2012-000983
- 33  
34  
35 45. Lane R, Stanton NA, Harrison D. Applying hierarchical task analysis to medication administration errors. *Applied Ergonomics* 2006;37(5):669-79. doi: 10.1016/j.apergo.2005.08.001
- 36  
37  
38  
39  
40  
41  
42  
43  
44  
45  
46  
47  
48  
49  
50  
51  
52  
53  
54  
55  
56  
57  
58  
59  
60



1  
2  
3  
4  
5  
6  
7  
8  
9  
10  
11  
12  
13  
14  
15  
16  
17  
18  
19  
20  
21  
22  
23  
24  
25  
26  
27  
28  
29  
30  
31  
32  
33  
34  
35  
36  
37  
38  
39  
40  
41  
42  
43  
44  
45  
46  
47  
48  
49  
50  
51  
52  
53  
54  
55  
56  
57  
58  
59  
60

## CAPTIONS FOR FIGURES

**Figure 1. The two workstreams and the associated research activities in the IMMO study.**

For peer review only

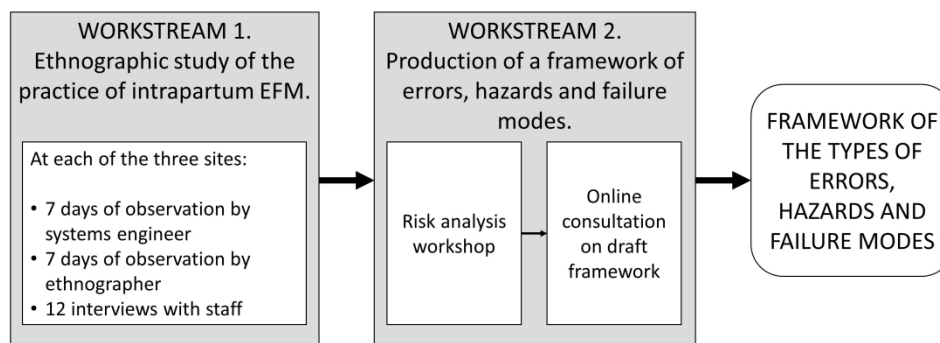

The two workstreams and the associated research activities in the IMMO study.

338x190mm (300 x 300 DPI)

# BMJ Open

## IMproving the practice of intrapartum electronic fetal heart rate MOnitoring with cardiotocography for safer childbirth (the IMMO programme): Protocol for a qualitative study

|                                 |                                                                                                                                                                                                                                                                                                                                                                                                                                                                                                                                                                                                                                                                                                                                                                                          |
|---------------------------------|------------------------------------------------------------------------------------------------------------------------------------------------------------------------------------------------------------------------------------------------------------------------------------------------------------------------------------------------------------------------------------------------------------------------------------------------------------------------------------------------------------------------------------------------------------------------------------------------------------------------------------------------------------------------------------------------------------------------------------------------------------------------------------------|
| Journal:                        | <i>BMJ Open</i>                                                                                                                                                                                                                                                                                                                                                                                                                                                                                                                                                                                                                                                                                                                                                                          |
| Manuscript ID                   | bmjopen-2019-030271.R1                                                                                                                                                                                                                                                                                                                                                                                                                                                                                                                                                                                                                                                                                                                                                                   |
| Article Type:                   | Protocol                                                                                                                                                                                                                                                                                                                                                                                                                                                                                                                                                                                                                                                                                                                                                                                 |
| Date Submitted by the Author:   | 22-May-2019                                                                                                                                                                                                                                                                                                                                                                                                                                                                                                                                                                                                                                                                                                                                                                              |
| Complete List of Authors:       | Lamé, Guillaume; University of Cambridge, The Healthcare Improvement Studies Institute (THIS Institute)<br>Liberati, Elisa ; University of Cambridge, The Healthcare Improvement Studies Institute (THIS Institute)<br>Burt, Jenni; University of Cambridge, The Healthcare Improvement Studies Institute (THIS Institute)<br>Draycott, Tim; University of Bristol, School of Social and Community Medicine; North Bristol NHS Trust, Women and Children's Health<br>Winter, Cathy; University of Bristol School of Social and Community Medicine; North Bristol NHS Trust, Women and Children's Health<br>Ward, James; University of Cambridge, Engineering Design Centre<br>Dixon-Woods, Mary ; University of Cambridge, The Healthcare Improvement Studies Institute (THIS Institute) |
| <b>Primary Subject Heading</b>: | Health services research                                                                                                                                                                                                                                                                                                                                                                                                                                                                                                                                                                                                                                                                                                                                                                 |
| Secondary Subject Heading:      | Obstetrics and gynaecology, Qualitative research                                                                                                                                                                                                                                                                                                                                                                                                                                                                                                                                                                                                                                                                                                                                         |
| Keywords:                       | Quality in health care < HEALTH SERVICES ADMINISTRATION & MANAGEMENT, Risk management < HEALTH SERVICES ADMINISTRATION & MANAGEMENT, Fetal medicine < OBSTETRICS, QUALITATIVE RESEARCH, Cardiotocography, electronic fetal heartrate monitoring                                                                                                                                                                                                                                                                                                                                                                                                                                                                                                                                          |
|                                 |                                                                                                                                                                                                                                                                                                                                                                                                                                                                                                                                                                                                                                                                                                                                                                                          |

SCHOLARONE™  
Manuscripts

# IMproving the practice of intrapartum electronic fetal heart rate MOnitoring with cardiotocography for safer childbirth (the IMMO programme): Protocol for a qualitative study

**Target journal:** BMJ Open

**Paper type:** Protocol

**Word count (excl. abstract, acknowledgements and references):** 3855 (max 4000)

**Authors:** Guillaume Lamé<sup>1\*</sup>, Elisa Liberati<sup>1</sup>, Jenni Burt<sup>1</sup>, Tim Draycott<sup>2,3</sup>, Cathy Winter<sup>2,3</sup>, James Ward<sup>4</sup>, Mary Dixon-Woods<sup>1</sup>.

<sup>1</sup>The Healthcare Improvement Studies Institute (THIS Institute), University of Cambridge, Cambridge, UK.

<sup>2</sup>School of Social and Community Medicine, University of Bristol, Bristol, UK

<sup>3</sup>Women and Children's Health, North Bristol NHS Trust, Bristol, UK

<sup>4</sup>Engineering Design Centre, University of Cambridge, Cambridge, UK.

\* corresponding author: [guillaume.lame@thisinstitute.cam.ac.uk](mailto:guillaume.lame@thisinstitute.cam.ac.uk) – 01223 761598 – The Healthcare Improvement Studies Institute, University of Cambridge, Cambridge Biomedical campus, Clifford Allbutt building, Cambridge CB2 0AH, United Kingdom.

## **Abstract:**

**Introduction:** Sub-optimal electronic fetal heart rate monitoring (EFM) in labour using CardioTocoGraphy (CTG) has been identified as one of the most common causes of avoidable harm in maternity care. Training staff is a frequently proposed solution to reduce harm. However, current approaches to training are heterogeneous in content and format, making it difficult to assess effectiveness. Technological solutions, such as digital decision support, have not yet demonstrated improved outcomes. Effective improvement strategies require in-depth understanding of the technical and social mechanisms underpinning the EFM process. The aim of this study is to advance current knowledge of the types of errors, hazards and failure modes in the process of classifying, interpreting, and responding to, CTG traces. This study is part of a broader research programme aimed at developing and testing an intervention to improve intrapartum EFM.

1  
2  
3  
4  
5  
6  
7  
8  
9  
10  
11  
12  
13  
14  
15  
16  
17  
18  
19  
20  
21  
22  
23  
24  
25  
26  
27  
28  
29  
30  
31  
32  
33  
34  
35  
36  
37  
38  
39  
40  
41  
42  
43  
44  
45  
46  
47  
48  
49  
50  
51  
52  
53  
54  
55  
56  
57  
58  
59  
60

**Methods and analysis:** The study is organised into two workstreams. First, we will conduct observations and interviews in three UK maternity units to gain an in-depth understanding of how intrapartum EFM is performed in routine clinical practice. Data analysis will combine the insights of an ethnographic approach (focused on the social norms and interactions, values and meanings that appear to be linked with the process of EFM) with a systems thinking approach (focused on modelling processes, actors and their interactions). Second, we will use risk analysis techniques to develop a framework of the errors, hazards and failure modes that affect intrapartum EFM.

**Ethics and dissemination:** This study has been approved by the West Midlands - South Birmingham Research Ethics Committee, reference number: 18/WM/0292. Dissemination will take the form of academic articles in peer-reviewed journals and conferences, along with tailored communication with various stakeholders in maternity care.

**Strengths and limitations of this study:**

- A multidisciplinary team of obstetricians, social scientists, midwives and engineers will collaborate to characterise the technical and social mechanisms that may affect the safety of EFM in labour.
- The study combines the strengths of ethnographic research and engineering approaches to systems analysis and risk assessment.
- This project will generate a detailed characterisation of the errors, hazards and failure modes in intrapartum EFM and will help to inform the development of an intervention that will directly target the reasons for problems in interpretation and response to CTG traces.
- Three maternity units across the UK will be selected; the generalisability of the findings will require careful assessment.

# Improving the practice of intrapartum electronic fetal heart rate Monitoring with cardiotocography for safer childbirth (the IMMO programme): Protocol for a qualitative study

## INTRODUCTION

Preventable harm related to childbirth can be catastrophic for women, children and families,<sup>1</sup> as well as causing high costs for health systems.<sup>2</sup> One important source of preventable harm in maternity care arises from sub-optimal fetal heart rate monitoring, particularly electronic fetal heart rate monitoring (EFM) using Cardiotocography (CTG) in labour.<sup>3</sup> Effective interventions to improve the practice of EFM have remained elusive, perhaps in part because of a lack of sound understanding of its range of influences on safety. We aim to generate a comprehensive characterisation of the technical and social mechanisms that may affect the safety of EFM in labour with the goal of informing the development of a targeted intervention for improvement.

## Fetal monitoring in labour

Two principal methods can be used to monitor the fetal heart rate in labour: intermittent auscultation and EFM with CTG. NICE guidelines recommend offering intermittent auscultation to women at low risk of complication during labour;<sup>4</sup> EFM is the recommended option in the presence of certain signs or conditions specified in the guidelines (such as fresh vaginal bleeding, hypertension or high temperature, or when oxytocin is used).<sup>4</sup> Our study focuses on the use of CTG, where the baby's heart rate is monitored through a Doppler ultrasound transducer and the woman's contractions are monitored through a uterine pressure transducer. Both signals are monitored continuously and recorded and/or printed as a CTG trace.<sup>5</sup> These traces are then used to detect fetal heart rate abnormalities and trigger appropriate action.

Interpretation and response to intrapartum CTG traces involves a series of complex socio-technical processes with many potential points of failure. **Interpretation** of CTG traces requires healthcare professionals to consider the classification of the trace in the context of the clinical circumstances of

1  
2  
3 the mother, the fetus and the status of labour, in order to formulate a response and take action. The  
4 initial classification involves review of four features on the CTG trace: the baseline heart rate,  
5 baseline variability, the presence of accelerations, and the presence or absence of decelerations, as  
6 well as characteristics of variable decelerations if present. NICE guidelines provide criteria to classify  
7 each feature as “reassuring”, “non-reassuring” or “abnormal”.<sup>4</sup> The trace itself is then classified in  
8 one of four ways: 1) “normal” (all features are reassuring), 2) “suspicious” (one non-reassuring  
9 feature and all other features are reassuring), 3) “pathological” (one abnormal feature or two or  
10 more non-reassuring features) or 4) “need for urgent intervention” (acute bradycardia, or a single  
11 prolonged deceleration for 3 minutes or more).  
12  
13

14 In determining **responses** to non-normal traces, NICE guidelines provide management indications to  
15 be considered in context with the clinical circumstances. The guidelines also recommend  
16 documenting any maternal or fetal risk factors, the woman’s and the unborn baby’s condition, CTG  
17 review every hour using a structured document, a ‘fresh eyes review of the CTG’, and seeking senior  
18 advice (from a senior midwife or an obstetrician) when the CTG is difficult to interpret or is not  
19 categorised as normal.  
20  
21

22 Despite the guidance, studies consistently show high levels of inter- and intra-observer variability in  
23 the interpretation of CTGs.<sup>6-9</sup> Some technological solutions have been proposed, including the  
24 introduction of computerised decision support systems for CTG interpretation in labour. However,  
25 their effectiveness remains unclear: a large randomised controlled trial did not indicate a benefit of  
26 computerised decision support.<sup>10</sup> Research on response to non-normal CTG traces has remained  
27 under-developed.  
28  
29

30 Overall, training for healthcare staff is currently the most frequently proposed solution to sub-  
31 optimal CTG practice.<sup>3 11 12</sup> The NHS England *Saving Babies’ Lives* “care bundle” states that all staff  
32 undertaking fetal monitoring should be trained in both the review system and the escalation  
33 protocol,<sup>12</sup> with mandatory yearly training and competency assessment. Implementation of this  
34 bundle is measured as the percentage of staff who have received training in fetal monitoring; the  
35 percentage deemed competent in fetal monitoring; and the percentage whom have successfully  
36 completed mandatory annual updates.  
37  
38

39 It is clearly important that such training be supported by high quality evidence. A 2011 systematic  
40 review concluded that training for CTG interpretation in labour can lead to improvements in  
41 individuals’ interpretation skills, inter-observer agreement, and management of intrapartum CTGs.<sup>13</sup>  
42 However, the training interventions included in the systematic review were highly heterogeneous in  
43 format and content (including e-learning, case reviews, monthly audit with feedback, voluntary  
44 review sessions, and clinical supervision through tele-didactics), making it difficult to draw definitive  
45 conclusions on what features and mechanisms of the training were linked with practice  
46 improvement. The authors of the systematic review also noted that the generally poor quality of the  
47 reviewed studies warrants caution with the findings.<sup>13</sup>  
48  
49

50 Perhaps because so little evidence exists, training programmes are not standardised,<sup>14</sup> and where  
51 programmes are implemented there are difficulties in demonstrating positive impacts. For example,  
52 in Denmark all midwives and physicians in maternity units were required to take part in a CTG  
53 education program consisting of e-learning, a one-day course, and a final written assessment.<sup>15</sup> The  
54 evaluation of this program suggested that it did not decrease the risk of birth hypoxia.<sup>16</sup> A national  
55 intervention in Sweden yielded similar results.<sup>17 18</sup>  
56  
57

58 One challenge in moving the field forward is that most of the effort so far is based on the  
59 assumption that improvement requires targeting deficits in individuals’ knowledge.<sup>19 20</sup> Improving  
60 each staff member’s knowledge and skill is clearly important, but insufficient attention has been

1  
2  
3 granted to the other dimensions of why it may be difficult to improve interpretation and response to  
4 EFM. CTG interpretation can, for example, be hindered by cognitive biases: individuals sometimes  
5 rely on intuition rather than objective guidelines to interpret and document intrapartum CTGs.<sup>21</sup>  
6

7 Even when intrapartum CTGs are interpreted correctly, the response may be sub-optimal. Social,  
8 organisational, and cultural features of maternity units and the wider institutions in which they sit  
9 may inhibit staff from taking the appropriate action, communicating their concerns, or reacting  
10 appropriately to a request for intervention.<sup>22 23</sup> Disagreements and divergences between midwives  
11 and obstetricians and conflicts over professional boundaries are an unfortunate characteristic of  
12 some maternity units.<sup>21 24 25</sup> Multiple other features of the labour process, including pressures on  
13 facilities, and aspirations of parents for their birth experience make the circumstances of decision-  
14 making and mobilisation of response particularly challenging.  
15  
16

17 Interpreting and reacting to a CTG trace is therefore best understood as a complex socio-technical  
18 process involving individuals from multiple professions and disciplines, taking place over a number of  
19 stages and in highly pressurised contexts. Given this, purely technical interventions (e.g. computer-  
20 assisted CTG analysis) and individual-based training are unlikely to fully address these challenges.  
21 We propose that understanding what can go wrong when EFM is used requires full characterisation  
22 of the work and social practices involved, the multiple professions who conduct such practices, and  
23 the context where the process takes place.<sup>26</sup>  
24  
25  
26  
27  
28

## 29 METHODS

### 30 Aims

31  
32  
33  
34  
35  
36  
37 The overarching aim of this study is to advance understanding of how intrapartum EFM is currently  
38 performed in UK maternity units, and where risks may occur, in order to inform the development of  
39 an intervention to improve practice. The study comprises two workstreams (Figure 1):  
40

- 41 1. An ethnographic study informed by systems engineering to characterise how intrapartum  
42 EFM is currently undertaken in UK maternity units
- 43 2. Production of a framework of the types of errors, hazards and failure modes in intrapartum  
44 EFM in UK maternity units  
45  
46

47 The study is expected to run between April 2019 and June 2020.  
48  
49  
50

### 51 Workstream 1: an ethnographic study of intrapartum EFM

52  
53  
54  
55 This workstream adopts an ethnographic approach combined with systems engineering analytical  
56 techniques to characterise how intrapartum EFM is currently undertaken in UK maternity units. We  
57 will conduct **observations** and **semi-structured interviews** with healthcare professionals in three  
58 different maternity units in the UK, in order to:  
59  
60



- Map the activities (and relevant risk and hazards) involved in EFM
- Identify and describe the contextual, cultural and socio-technical factors that influence practices of EFM with CTG.

*Ethnography* is an approach to social and organizational research that draws on researchers' close observation of and involvement with people in a particular setting, with the aim of accessing their *point of view* – namely, their perspectives in and on the world they inhabit.<sup>27</sup> This approach allows the examination of important aspects of clinical work that may be invisible or difficult to articulate by professionals themselves and that may not be amenable to measurement in the traditional sense.<sup>28</sup> It is especially well-suited to identifying the informal interactions that may create or prevent risk, and to shedding light on the multiple influencing factors that shape clinical practice.

Ethnography may also offer insights on the wider organizational and cultural dynamics that may explain why accidents or 'close calls' are welcomed as a learning opportunity in some contexts, and ignored or normalized in others.<sup>29</sup>

*Systems engineering* focuses on how to design and manage complex systems over their lifecycles. Adopting 'systems thinking' principles<sup>30</sup> and approaches from human factors analysis,<sup>31</sup> it seeks to ensure that all relevant aspects (social and technical) of a complex process or system are considered and integrated into a whole. The approach is particularly useful in gaining a comprehensive and thorough understanding of the risk and hazards that may affect complex healthcare processes. Systems engineers working on health services can collect and use multiple types of data, both quantitative and qualitative, including data collected through observation.<sup>32-34</sup>

## Eligibility criteria

The research participants in this study will be staff in the maternity units who are directly or indirectly involved in the process of EFM with CTG. We will observe staff in the participating maternity units who are directly or indirectly involved in the process of EFM with CTG, including, for example, obstetricians, midwives, nurses, anaesthetists, maternity care assistants, maternity theatre staff, auxiliary/administrative staff, and management staff. Women and birth partners/relatives will not be the main participants of the study, but are likely to be included in the observations.

For the interviews, we will include doctors and midwives in the participating maternity units who are directly involved in using EFM with CTG. We do not plan to interview women and birth partners/relatives.

## Sampling

Three maternity units will be included in the study. They will be selected purposively based on their size, calculated through annual number of births. Units' size and geographic situation have also been shown to be correlated with CTG interpretation skills.<sup>35</sup> We will recruit one small unit (fewer than 2,000 births/year), one medium unit (2,000 to 5,000 births/year), and one large unit (more than 5,000 births/year). We will also take into account the geographic situation of the hospital. The objective of this sampling strategy is to understand CTG processes and practices and their variations in practice.

1  
2  
3 In each maternity unit, we will recruit up to 12 individual members of staff for interviews. Interview  
4 participants will be selected purposively: we will seek to interview participants with different  
5 professional backgrounds (midwives and obstetricians), seniority and professional experiences in  
6 maternity care.  
7  
8  
9

## 10 Observations

11  
12  
13  
14 We expect that a social scientist and a systems engineer will each spend up to seven days in the  
15 three participating maternity units (together or at different times), combining day and night  
16 observations, and conducting observation blocks of around 8 hours per day/night. The focus of the  
17 observations will be the process through which CTG traces are classified and actions are  
18 documented; observers may also 'shadow' <sup>36</sup> midwives and obstetricians in order to understand the  
19 interactions between professionals, and between professionals and parents, and the escalation  
20 mechanisms used in response to CTG traces. Our observations will focus on EFM with CTG in  
21 intrapartum care (rather than ante-natal care); we therefore expect the bulk of the observations to  
22 be conducted in labour wards. However, depending on how each unit organises admission  
23 procedures and early labour checks, and because of the practicalities of shadowing staff, observers  
24 may also occasionally visit the antenatal ward.  
25  
26

27 The ethnographers' observations will focus mainly on the social and contextual factors that influence  
28 fetal monitoring practice and outcomes. The systems engineer will capture and map the constituting  
29 activities, and the hazards and risks that characterize the process using human factors concepts  
30 drawn from existing frameworks, e.g. methods and models to guide observations (e.g. the SEIPS  
31 framework,<sup>37</sup> the Yorkshire framework of factors contributing to incidents in hospitals,<sup>38</sup> process  
32 modelling<sup>39</sup> and Task analysis<sup>40</sup>).  
33  
34

35 The data collected will consist of anonymised field notes taken during the observations. At the end  
36 of each day, these notes will be dictated and recorded using an encrypted voice recorder for later  
37 transcription, or written up manually.  
38

39 No photos or videos will be taken of human subjects, but we may take pictures of equipment.  
40 Researchers will additionally request relevant documents (e.g. local guidelines, CTG pro formas and  
41 documentation tools, training materials, posters etc.) from sites. If these documents contain  
42 identifying information about any individuals, they will be anonymized prior to storage and analysis.  
43  
44  
45  
46

### 47 *Consent for observations*

48 As we have found in previous studies, it will not be practical nor appropriate to obtain written  
49 consent in all situations where we will be conducting observations. We are conscious that in some  
50 circumstances asking people for written consent for observations can make them uncomfortable,  
51 disrupt clinical work, or alter people's behaviour. In such situations, obtaining written consent is  
52 more likely to be for the researchers' benefit than those being studied. Therefore, we plan to use an  
53 approach we have used successfully in previous studies, which relies on obtaining permission from  
54 those being observed, ensuring that those who wish to opt out can easily make this known, and  
55 recording only completely anonymised data.  
56  
57

58 We will ensure that staff being observed are informed of the project and are given written  
59 information to explain it. Researchers will always explain who they are and will wear an appropriate  
60

1  
2  
3 identifying badge. They will obtain verbal permission from staff where possible (sometimes this may  
4 be from a senior person on behalf of a group) to conduct observations. They will only enter the bed  
5 space of pregnant and postpartum women with the permission and agreement of clinical staff and  
6 women, and will leave immediately if requested to do so, or if there is any indication (even  
7 unvoiced) that women or birth partners/relatives would prefer them not to be there.  
8

9  
10 Women and their birth partners/relatives are not the focus of the study, and we will not seek their  
11 written consent. However, the nature of the ethnography means that we may carry out observations  
12 of staff as they come into contact with women whilst carrying out their routine clinical duties.  
13 Pregnant and postpartum women will only be observed with their permission and agreement and  
14 the permission of clinical staff. Women and birth partners will be advised verbally and in writing  
15 (using posters and leaflets) that they can decline observations. The researchers will be sensitive to  
16 explaining the aims of the study in a way that will not raise undue concerns in women and birth  
17 partners.  
18  
19

## 20 21 22 Interviews

23  
24  
25 The interview schedule will cover participants' experience of EFM, their views on EFM, the training  
26 they have received, and their understanding of the factors that may influence EFM processes and  
27 outcomes. Staff will be offered the choice of being interviewed individually or in a small group of  
28 two or three participants. Interviews may also be arranged by telephone if participants are not  
29 available on the days of the visits. All interviews will be audio-recorded on an encrypted voice  
30 recorder (with participants' consent) and transcribed verbatim for analysis.  
31  
32

### 33 *Consent for interviews*

34 We will obtain written informed consent for all recorded interviews.  
35  
36  
37  
38

## 39 Data analysis

40  
41  
42 Data analysis will run alongside ongoing fieldwork and will be conducted in two phases, comprising  
43 initial, disciplinary-specific analyses of data, followed by an integrative analysis. In the first phase of  
44 analysis, the ethnographers and the systems engineer will analyse their observation data separately  
45 (i.e. the systems engineer will only analyse data they will have collected, and the ethnographers will  
46 only analyse data collected by ethnographers). This is because observations are expected to be  
47 dependent on the perspective and sensitising concepts used by the different observers. In this  
48 phase, ethnographers and systems engineers will additionally analyse the whole interview dataset  
49 separately.  
50  
51

52 In their respective first phase analyses of observation and interview data, the researchers will adopt  
53 different but complementary approaches. The ethnographers' analysis will be based on the constant  
54 comparative method.<sup>41</sup> It will be informed by sensitizing concepts identified through an earlier  
55 literature review, including the role of power and psychological safety. These concepts may be  
56 revised, modified or made redundant as analysis proceeds. The engineer's analysis will be based on  
57 systems thinking principles and risk analysis approaches. The main aim of the analysis will be to  
58 produce a comprehensive description of the process of EFM with CTG, using systems modelling  
59  
60

1  
2  
3 techniques to describe the processes, actors and their interactions.<sup>39</sup> Depending on the nature of the  
4 findings, frameworks such as the Yorkshire and Systems Engineering Initiative for Patient Safety  
5 (SEIPS) frameworks may be used to support the analysis.<sup>31 38</sup>  
6

7 In the second phase of analysis, the researchers will integrate their analyses. This combination of  
8 different disciplines and bodies of knowledge, will facilitate a synthesis between a rich  
9 understanding of individual sites and the ability to generalize from the specifics of these cases, to  
10 enable the development of new knowledge and inform action in this area.  
11

12 Debriefing sessions of the research team will be recorded, transcribed and treated as data alongside  
13 the field notes. QSR NVivo software will be used to aid the coding, management and retrieval of  
14 data.  
15  
16

## 17 18 19 **Workstream 2: building a framework of errors, risks and failure modes in** 20 **intrapartum EFM** 21 22

23  
24  
25 In Workstream 2, we aim to build a framework of errors, hazards and failure modes in EFM with  
26 CTG, and identify the underlying mechanisms that can explain these. In doing this, we will draw on  
27 the findings from Workstream 1 as well as concepts from the sociology of risk (e.g. normalisation of  
28 deviance<sup>42</sup>), psychology (e.g. cognitive biases,<sup>43</sup> automaticity,<sup>44</sup> groupthink<sup>45</sup>) and human factors  
29 (e.g. socio-technical systems<sup>46</sup>).  
30  
31

### 32 33 34 **Design, data collection and data analysis** 35 36

37 Our approach is informed by recent attempts to integrate different sources of knowledge into risk  
38 assessment efforts.<sup>47</sup> In our case, the choice of modelling approaches (e.g. process maps,  
39 stakeholders maps, risk analysis methods<sup>39 47</sup>) will to some extent depend on the information  
40 collected, and cannot yet be determined. We plan to combine different approaches, as previous  
41 research has shown the benefit of combining complementary risk management methods in health  
42 services.<sup>48</sup> First, we will create a representation of the intrapartum CTG interpretation and  
43 management process, drawing on observations from the ethnographic study (Workstream 1) and  
44 the extant literature. Second, using prospective risk analysis approaches (such as Failure Modes and  
45 Effects Analysis<sup>49</sup> or Hierarchical Task Analysis<sup>50</sup>) we will analyse this process to identify where  
46 problems may occur. Finally, where relevant, we will link these issues to documented patterns (e.g.  
47 cognitive biases or normalisation of deviance) in order to build on the existing knowledge of these  
48 phenomena and how to tackle them.  
49  
50

51 As part of our strategy for ensuring multidisciplinary synthesis, we will conduct a two-day workshop  
52 with the research team and relevant experts, as well as other stakeholders in healthcare risk  
53 management, obstetrics and midwifery. At this workshop, participants will reflect on, adapt and  
54 develop the representation and analysis of the intrapartum CTG interpretation and management  
55 process, to inform framework development.  
56  
57

58 The output of this phase of work will be a theoretically and empirically grounded framework of the  
59 errors, hazards and failure modes in the interpretation of, and reaction to, intrapartum CTG traces.  
60

### *Consent for workshop participants*

Prior to the workshop, participants will be asked to give consent to the recording of the workshop and the use of data produced during the workshop (including anonymised quotes) for research purposes. This is so that we can report on the process of building the framework in publications. To this end, the workshop will be audio-recorded, and the recording will be transcribed.

### Assessing the framework's comprehensiveness through a stakeholder consultation

To ensure that the framework is comprehensive in its description of errors, hazards and failure modes in the process of EFM, we will submit the final product developed from the workshops to the assessment of a broad range of stakeholders, using an online consultation. Participants will be separate from those who participated in the workshop, and will represent obstetrics, midwifery, risk management, third sector organisations and other relevant groups.

It is too early at this stage to decide on the exact form of this consultation, which will be designed to complement the content and nature of the framework. However, it is likely to comprise a questionnaire on the comprehensiveness of the framework, asking participants to suggest additional items or remove existing ones, and asking them to rate the clarity of each item. It is possible that this may be done using a citizen science approach using THIS Institute's platform.

The product of this consultation will be a revised framework, ready for use in the next phases of this research programme, which ultimately aims to develop and evaluate an intervention to improve the use of intrapartum EFM.

### **Patient & Public Involvement (PPI)**

Issues with maternity safety in general, and EFM in particular, have received wide attention in recent years. Our exchanges with PPI groups have shown that the issue is of critical importance to pregnant women. Whilst pregnant women are not the primary focus of this study, we are keen to engage and involve this group along with other stakeholders in the design, conduct and dissemination of the research.

We have engaged with a network of women (maternity users) to advise us on how best to introduce the study to women in labour during our ethnographic study. These individuals reviewed our participant material (participant information leaflet, consent form, and poster) and modifications were made to the material, and to guidance on how and when to approach women in labour.

Our objective at this stage is to understand how professionals make decisions to act on a certain type of clinical information (CTG traces). The opportunities to involve pregnant and postpartum women in the research itself are limited. We plan to engage deeply with women (maternity users) in

1  
2  
3 later stages of this work programme, when we will consider potential interventions to improve the  
4 practice of EFM.  
5  
6  
7  
8

## 9 **ETHICS AND DISSEMINATION**

10  
11  
12  
13 This study has received ethical approval from the West Midlands - South Birmingham Research  
14 Ethics Committee, reference number: 18/WM/0292.  
15

16 The main risks in this project are likely to arise when researchers are in direct contact with  
17 women/relatives in the clinical setting, during the ethnographic study (Workstream 1). We are  
18 aware of the sensitive nature of conducting observational research in a maternity care setting and  
19 are experienced in the conduct of such work. We will seek to reduce risks in the following ways:  
20

- 21 • Making sure that staff, women, and partners/relatives are informed about the project, using  
22 information sheets and posters.
- 23 • The ethnographic field researchers are highly experienced researchers with extensive  
24 expertise in sensitive research. They will provide ongoing support and supervision for the  
25 systems engineer whilst on-site. The researchers will always explain who they are and will  
26 wear an appropriate identifying badge. They will obtain verbal permission where possible  
27 (sometimes this may be from a senior person on behalf of a group) to conduct observations,  
28 and staff and women will have the right to refuse to be observed if they wish.
- 29 • The researchers will shadow members of staff and will only enter clinical areas such as  
30 labour rooms or theatres if this is essential. They will only enter the environment of women  
31 and partners/relatives with the permission and agreement of clinical staff and women.
- 32 • It is acknowledged that labour can be distressing for women/relatives, particularly if  
33 problems arise. The ethnographic field researchers will check with staff and  
34 women/relatives if they are happy for them to be present, and will leave immediately if  
35 there is any indication (even unvoiced) that staff, women or their families would prefer them  
36 not to be there.
- 37 • The researchers will take full hygiene precautions.  
38  
39  
40  
41

42 The findings of this study will be communicated in peer-reviewed journal articles and conferences.  
43 We will also consider additional communication channels to convey the results to professionals, e.g.  
44 blog posts and communication on social media.  
45  
46  
47  
48  
49

## 50 **AUTHORS' CONTRIBUTION**

51 MDW, JB, EL, TD, CW and GL conceived the initial idea for the study. GL coordinated the writing of  
52 the protocol with input from all co-authors. MDW, JB, EL, TD, CW and JW commented on the  
53 protocol and provided substantial ideas in their respective areas of expertise. GL drafted the paper  
54 and all authors revised it. All authors approved the submitted version of the paper.  
55  
56  
57  
58  
59  
60

## FUNDING STATEMENT

This research project is carried out by The Healthcare Improvement Studies Institute at the University of Cambridge. The Institute is supported by the Health Foundation - an independent charity committed to bringing about better health and health care for people in the UK. This work was also supported by MDW's Wellcome Trust Investigator award WT09789. MDW is a National Institute for Health Research (NIHR) Senior Investigator.

## COMPETING INTERESTS

TD is a trustee of the PRACTICAL Obstetric Multi-Professional Training (PROMPT) Maternity Foundation. The PROMPT Maternity Foundation (PMF) is an independent charity (registered charity number 1140557) set up to save the lives of mothers and babies through evidence-based, multi-professional training and research. This includes training on fetal heart rate monitoring. TD and CW are members of the steering group of PMF. CW is seconded from North Bristol Trust as the lead research midwife for PMF. TD does not receive any financial reward from his association with PMF.

## REFERENCES

1. Kirkup B. The Report of the Morecambe Bay Investigation. London, UK: Morecambe Bay Investigation, 2015:221.
2. NHS Resolution. Annual report and accounts 2016/17. London: NHS Resolution, 2017:168.
3. NHS Litigation Authority. Ten Years of Maternity Claims - An Analysis of NHS Litigation Authority Data. London: NHS Litigation Authority, 2012.
4. NICE. Intrapartum care for healthy women and babies. London: National Institute for Health and Care Excellence, 2014:89.
5. Alfirevic Z, Devane D, Gyte GML, et al. Continuous cardiotocography (CTG) as a form of electronic fetal monitoring (EFM) for fetal assessment during labour. In: The Cochrane C, ed. Cochrane Database of Systematic Reviews. Chichester, UK: John Wiley & Sons, Ltd 2017.
6. Sabiani L, Le Dû R, Loundou A, et al. Intra- and interobserver agreement among obstetric experts in court regarding the review of abnormal fetal heart rate tracings and obstetrical management. *American Journal of Obstetrics and Gynecology* 2015;213(6):856.e1-56.e8. doi: 10.1016/j.ajog.2015.08.066
7. Chauhan SP, Klausner CK, Woodring TC, et al. Intrapartum nonreassuring fetal heart rate tracing and prediction of adverse outcomes: interobserver variability. *American Journal of Obstetrics and Gynecology* 2008;199(6):623.e1-23.e5. doi: 10.1016/j.ajog.2008.06.027
8. Blix E. Inter-observer variation in assessment of 845 labour admission tests: comparison between midwives and obstetricians in the clinical setting and two experts. *BJOG: An International Journal of Obstetrics and Gynaecology* 2003;110(1):1-5. doi: 10.1016/S1470-0328(02)02105-5

- 1
  - 2
  - 3
  - 4
  - 5
  - 6
  - 7
  - 8
  - 9
  - 10
  - 11
  - 12
  - 13
  - 14
  - 15
  - 16
  - 17
  - 18
  - 19
  - 20
  - 21
  - 22
  - 23
  - 24
  - 25
  - 26
  - 27
  - 28
  - 29
  - 30
  - 31
  - 32
  - 33
  - 34
  - 35
  - 36
  - 37
  - 38
  - 39
  - 40
  - 41
  - 42
  - 43
  - 44
  - 45
  - 46
  - 47
  - 48
  - 49
  - 50
  - 51
  - 52
  - 53
  - 54
  - 55
  - 56
  - 57
  - 58
  - 59
  - 60
9. Devane D, Lalor J. Midwives' visual interpretation of intrapartum cardiotocographs: intra- and inter-observer agreement. *Journal of Advanced Nursing* 2005;52(2):133-41. doi: 10.1111/j.1365-2648.2005.03575.x
10. Brocklehurst P, Field D, Greene K, et al. Computerised interpretation of fetal heart rate during labour (INFANT): a randomised controlled trial. *The Lancet* 2017;389(10080):1719-29. doi: 10.1016/S0140-6736(17)30568-8
11. Royal College of Obstetricians and Gynaecologists. Each Baby Counts: 2015 Summary Report. London: RCOG, 2017.
12. NHS England. Saving Babies' Lives - A care bundle for reducing stillbirth. London: NHS England, 2016:30.
13. Pehrson C, Sorensen J, Amer-Wåhlin I. Evaluation and impact of cardiotocography training programmes: a systematic review: Evaluation and impact of CTG training programmes. *BJOG: An International Journal of Obstetrics & Gynaecology* 2011;118(8):926-35. doi: 10.1111/j.1471-0528.2011.03021.x
14. Ugwumadu A, Steer P, Parer B, et al. Time to optimise and enforce training in interpretation of intrapartum cardiotocograph. *BJOG: An International Journal of Obstetrics & Gynaecology* 2016;123(6):866-69. doi: 10.1111/1471-0528.13846
15. Thellesen L, Bergholt T, Hedegaard M, et al. Development of a written assessment for a national interprofessional cardiotocography education program. *BMC Medical Education* 2017;17:88. doi: 10.1186/s12909-017-0915-2
16. Thellesen L. A national cardiotocography education programme-Development, validation and impact on interpretation skills and birth hypoxia. University of Copenhagen, 2016.
17. Millde-Luthander C, Källen K, Nyström ME, et al. Results from the National Perinatal Patient Safety Program in Sweden: the challenge of evaluation. *Acta Obstetrica et Gynecologica Scandinavica* 2016;95(5):596-603. doi: 10.1111/aogs.12873
18. Millde-Luthander C, Högberg U, Nyström ME, et al. The impact of a computer assisted learning programme on the ability to interpret cardiotocography. A before and after study. *Sexual & Reproductive Healthcare* 2012;3(1):37-41. doi: 10.1016/j.srhc.2011.10.001
19. Magro M. Five years of cerebral palsy claims - A thematic review of NHS Resolution data. London, UK: NHS Resolution, 2017:92.
20. Edozien LC. Situational Awareness and Its Application in the Delivery Suite. *Obstetrics & Gynecology* 2015;125(1):65-69. doi: 10.1097/AOG.0000000000000597
21. Simpson KR, James DC, Knox GE. Nurse-Physician Communication During Labor and Birth: Implications for Patient Safety. *Journal of Obstetric, Gynecologic & Neonatal Nursing* 2006;35(4):547-56. doi: 10.1111/j.1552-6909.2006.00075.x
22. McKeivitt S, Gillen P, Sinclair M. Midwives' and doctors' attitudes towards the use of the cardiotocograph machine. *Midwifery* 2011;27(6):e279-e85. doi: 10.1016/j.midw.2010.11.003
23. Symon AG, McStea B, Murphy-Black T. An exploratory mixed-methods study of Scottish midwives' understandings and perceptions of clinical near misses in maternity care. *Midwifery* 2006;22(2):125-36. doi: 10.1016/j.midw.2005.05.005
24. Reiger K. Domination or Mutual Recognition? Professional Subjectivity in Midwifery and Obstetrics. *Social Theory & Health* 2008;6(2):132-47. doi: 10.1057/palgrave.sth.2007.12
25. Pollard KC. How midwives' discursive practices contribute to the maintenance of the status quo in English maternity care. *Midwifery* 2011;27(5):612-19. doi: 10.1016/j.midw.2010.06.018
26. Altaf S, Oppenheimer C, Shaw R, et al. Practices and views on fetal heart monitoring: a structured observation and interview study. *BJOG: An International Journal of Obstetrics & Gynaecology* 2006;113(4):409-18. doi: 10.1111/j.1471-0528.2006.00884.x
27. Hammersley M, Atkinson P. *Ethnography: principles in practice*. London: Routledge 2007.
28. Dixon-Woods M. What can ethnography do for quality and safety in health care? *Quality and Safety in Health Care* 2003;12(5):326-27. doi: 10.1136/qhc.12.5.326



- 1
- 2
- 3
- 4 29. Macrae C. Close calls : managing risk and resilience in airline flight safety. Basingstoke: Palgrave  
5 Macmillan 2014.
- 6 30. Jackson MC. Systems thinking: creative holism for managers. Chichester; Hoboken, NJ: John Wiley  
7 & Sons 2003.
- 8 31. Carayon P, Hundt AS, Karsh BT, et al. Work system design for patient safety: the SEIPS model.  
9 *Quality & Safety in Health Care* 2006;15(Suppl 1):i50-i58. doi: 10.1136/qshc.2005.015842
- 10 32. Catchpole K, Neyens DM, Abernathy J, et al. Framework for direct observation of performance and  
11 safety in healthcare. *BMJ Quality & Safety* 2017;26(12):1015-21. doi: 10.1136/bmjqs-2016-  
12 006407
- 13 33. Hughes J, King V, Rodden T, et al. Moving out from the control room: ethnography in system  
14 design. Proceedings of the 1994 ACM conference on Computer supported cooperative work.  
15 Chapel Hill, North Carolina, USA: ACM, 1994:429-39.
- 16 34. Carayon P, Xie A, Kianfar S. Human factors and ergonomics as a patient safety practice. *BMJ Quality  
17 & Safety* 2014;23(3):196-205. doi: 10.1136/bmjqs-2013-001812
- 18 35. Thellesen L, Sorensen JL, Hedegaard M, et al. Cardiocography interpretation skills and the  
19 association with size of maternity unit, years of obstetric work experience and healthcare  
20 professional background: a national cross-sectional study. *Acta Obstetrica et Gynecologica  
21 Scandinavica* 2017;96(9):1075-83. doi: 10.1111/aogs.13171
- 22 36. Czarniawska-Joerges B. Shadowing and other techniques for doing fieldwork in modern societies:  
23 Copenhagen Business School Press DK 2007.
- 24 37. Carayon P, Wetterneck TB, Rivera-Rodriguez AJ, et al. Human factors systems approach to  
25 healthcare quality and patient safety. *Applied Ergonomics* 2014;45(1):14-25. doi:  
26 10.1016/j.apergo.2013.04.023
- 27 38. Lawton R, McEachan RRC, Giles SJ, et al. Development of an evidence-based framework of factors  
28 contributing to patient safety incidents in hospital settings: a systematic review. *BMJ Quality  
29 & Safety* 2012 doi: 10.1136/bmjqs-2011-000443
- 30 39. Jun GT, Ward J, Morris Z, et al. Health care process modelling: which method when? *International  
31 Journal for Quality in Health Care* 2009;21(3):214-24. doi: 10.1093/intqhc/mzp016
- 32 40. Reason J. Combating omission errors through task analysis and good reminders. *Quality and Safety  
33 in Health Care* 2002;11(1):40-44. doi: 10.1136/qhc.11.1.40
- 34 41. Charmaz K. Constructing grounded theory: A practical guide through qualitative analysis. London:  
35 Sage 2006.
- 36 42. Prielipp RC, Magro M, Morell RC, et al. The Normalization of Deviance: Do We (Un)Knowingly  
37 Accept Doing the Wrong Thing? *Anesthesia & Analgesia* 2010;110(5):1499-502. doi:  
38 10.1213/ANE.0b013e3181d5adc5
- 39 43. Croskerry P. From Mindless to Mindful Practice — Cognitive Bias and Clinical Decision Making. *New  
40 England Journal of Medicine* 2013;368(26):2445-48. doi: 10.1056/NEJMp1303712
- 41 44. Toft B, Mascie-Taylor H. Involuntary automaticity: a work-system induced risk to safe health care.  
42 *Health Services Management Research* 2005;18(4):211-16. doi:  
43 10.1258/095148405774518615
- 44 45. Kaba A, Wishart I, Fraser K, et al. Are we at risk of groupthink in our approach to teamwork  
45 interventions in health care? *Medical Education* 2016;50(4):400-08. doi: 10.1111/medu.12943
- 46 46. Carayon P. Human factors of complex sociotechnical systems. *Applied Ergonomics* 2006;37(4):525-  
47 35. doi: 10.1016/j.apergo.2006.04.011
- 48 47. Simsekler MCE, Ward JR, Clarkson PJ. Design for Patient Safety: A Systems-based Risk Identification  
49 Framework. *Ergonomics* 2018:1-39. doi: 10.1080/00140139.2018.1437224
- 50 48. Chatzimichailidou MM, Ward J, Horberry T, et al. A Comparison of the Bow-Tie and STAMP  
51 Approaches to Reduce the Risk of Surgical Instrument Retention. *Risk Analysis*:n/a-n/a. doi:  
52 10.1111/risa.12897
- 53 49. Vélez-Díaz-Pallarés M, Delgado-Silveira E, Carretero-Accame ME, et al. Using Healthcare Failure  
54 Mode and Effect Analysis to reduce medication errors in the process of drug prescription,  
55  
56  
57  
58  
59  
60

1  
2  
3  
4  
5  
6  
7  
8  
9  
10  
11  
12  
13  
14  
15  
16  
17  
18  
19  
20  
21  
22  
23  
24  
25  
26  
27  
28  
29  
30  
31  
32  
33  
34  
35  
36  
37  
38  
39  
40  
41  
42  
43  
44  
45  
46  
47  
48  
49  
50  
51  
52  
53  
54  
55  
56  
57  
58  
59  
60

validation and dispensing in hospitalised patients. *BMJ Quality & Safety* 2013;22(1):42-52. doi: 10.1136/bmjqs-2012-000983

50. Lane R, Stanton NA, Harrison D. Applying hierarchical task analysis to medication administration errors. *Applied Ergonomics* 2006;37(5):669-79. doi: 10.1016/j.apergo.2005.08.001

For peer review only

## CAPTIONS FOR FIGURES

Figure 1. The two workstreams and the associated research activities in the IMMO study.

For peer review only

1  
2  
3  
4  
5  
6  
7  
8  
9  
10  
11  
12  
13  
14  
15  
16  
17  
18  
19  
20  
21  
22  
23  
24  
25  
26  
27  
28  
29  
30  
31  
32  
33  
34  
35  
36  
37  
38  
39  
40  
41  
42  
43  
44  
45  
46  
47  
48  
49  
50  
51  
52  
53  
54  
55  
56  
57  
58  
59  
60

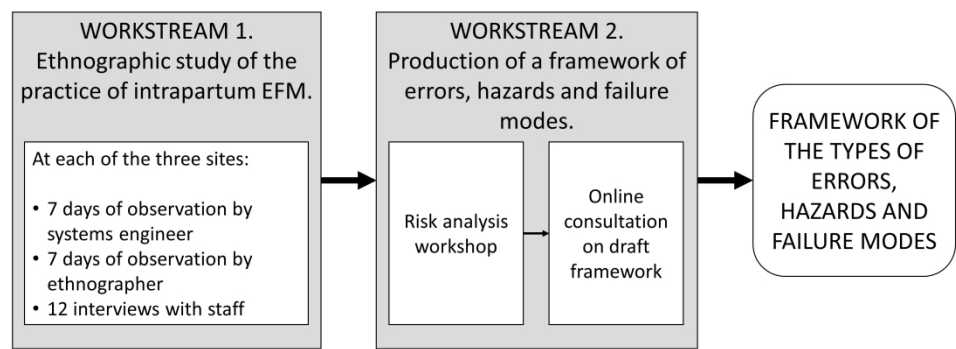

The two workstreams and the associated research activities in the IMMO study.

338x190mm (300 x 300 DPI)
